# Supplementary material for: Functionalized nanometer-sized alumina supported micro-solid phase extraction coupled to inductively coupled plasma mass spectrometry for preconcentration and determination of trace metal ions in gasoline samples
Source: Royal Society of Chemistry journal article supplement (doi:10.1039/c4ra07074g), 2014-09-08
Supplement: c4ra07074g1.pdf [file c4ra07074g1.pdf]

## SUPPLEMENTARY TABLES

**Table S1** 2<sup>6-2</sup> Fractional factorial design matrix and analytical results (% recovery) of each metal ion. These factors include mass of the sorbent (MS), sample pH, preconcentration flow rate (PFR) eluent concentration (EC), eluent volume (EV) and eluent flow rate (EFR).

| Runs | MS  | EV   | EFR | pH  | PFR | EC | Co   | Cr    | Mn    | Ni    | Ti    |
|------|-----|------|-----|-----|-----|----|------|-------|-------|-------|-------|
| 1    | 30  | 0.5  | 0.5 | 5   | 5   | 1  | 50.4 | 55.6  | 60.6± | 48.2± | 46.9± |
| 2    | 30  | 0.5  | 0.5 | 10  | 5   | 3  | 51.2 | 66.7  | 63.2± | 50.2± | 45.9± |
| 3    | 30  | 0.5  | 1.5 | 5   | 10  | 3  | 55.6 | 78.6± | 67.8± | 61.1± | 58.8± |
| 4    | 30  | 0.5  | 1.5 | 10  | 10  | 1  | 56.1 | 86.5± | 69.6± | 65.5± | 59.9± |
| 5    | 30  | 2    | 0.5 | 5   | 10  | 3  | 61.6 | 69.8± | 73.8± | 56.9± | 61.8± |
| 6    | 30  | 2    | 0.5 | 10  | 10  | 1  | 62.6 | 79.3± | 76.3± | 62.8± | 63.7± |
| 7    | 30  | 2    | 1.5 | 5   | 5   | 1  | 71.0 | 87.0± | 87.4± | 74.9± | 73.3± |
| 8    | 30  | 2    | 1.5 | 10  | 5   | 3  | 72.9 | 93.4± | 88.1± | 81.9± | 79.5± |
| 9    | 100 | 0.5  | 0.5 | 5   | 10  | 1  | 67.3 | 68.2± | 79.5± | 61.6± | 55.4± |
| 10   | 100 | 0.5  | 0.5 | 10  | 10  | 3  | 68.3 | 70.6± | 80.0± | 65.0± | 57.6± |
| 11   | 100 | 0.5  | 1.5 | 5   | 5   | 3  | 76.7 | 84.4± | 86.4± | 67.2± | 86.9± |
| 12   | 100 | 0.5  | 1.5 | 10  | 5   | 1  | 78.7 | 91.3± | 91.0± | 72.8± | 89.9± |
| 13   | 100 | 2    | 0.5 | 5   | 5   | 3  | 89.3 | 92.3± | 85.7± | 74.3± | 75.4± |
| 14   | 100 | 2    | 0.5 | 10  | 5   | 1  | 90.0 | 95.1± | 88.5± | 75.1± | 77.7± |
| 15   | 100 | 2    | 1.5 | 5   | 10  | 1  | 96.4 | 95.8± | 97.0± | 96.1± | 94.3± |
| 16   | 100 | 2    | 1.5 | 10  | 10  | 3  | 97.2 | 97.0± | 98.1± | 97.7± | 96.9± |
| 17   | 65  | 1.25 | 1   | 7.5 | 7.5 | 2  | 88.7 | 83.5± | 86.2± | 77.1± | 74.6± |
| 18   | 65  | 1.25 | 1   | 7.5 | 7.5 | 2  | 88.5 | 83.7± | 86.1± | 77.1± | 74.5± |
| 19   | 65  | 1.25 | 1   | 7.5 | 7.5 | 2  | 88.5 | 83.7± | 86.1± | 77.2± | 74.7± |

**Table S2** List of experiments in the central composite design (actual values) and analytical results (% recovery) of each metal ion

| <b>Run</b> | <b>MS</b> | <b>EV</b> | <b>EFR</b> | <b>Co</b> | <b>Cr</b> | <b>Mn</b> | <b>Ni</b> | <b>Ti</b> |
|------------|-----------|-----------|------------|-----------|-----------|-----------|-----------|-----------|
| <b>1</b>   | 30        | 1         | 1          | 48.23     | 50.13     | 54.01     | 47.38     | 50.13     |
| <b>2</b>   | 100       | 1         | 1          | 88.74     | 83.44     | 90.22     | 73.87     | 85.48     |
| <b>3</b>   | 30        | 2         | 1          | 61.23     | 65.91     | 69.43     | 54.63     | 66.01     |
| <b>4</b>   | 100       | 2         | 1          | 94.87     | 95.91     | 96.83     | 97.13     | 96.65     |
| <b>5</b>   | 30        | 1         | 1          | 52.18     | 68.16     | 70.98     | 63.76     | 64.77     |
| <b>6</b>   | 100       | 1         | 1          | 98.80     | 98.93     | 99.03     | 98.28     | 97.78     |
| <b>7</b>   | 30        | 1         | 2          | 67.58     | 58.13     | 61.47     | 55.65     | 59.08     |
| <b>8</b>   | 100       | 1         | 2          | 96.18     | 94.13     | 95.09     | 93.81     | 95.67     |
| <b>9</b>   | 65        | 1         | 1          | 96.81     | 78.38     | 81.60     | 73.43     | 83.18     |
| <b>10</b>  | 65        | 2         | 1          | 89.73     | 97.94     | 98.34     | 97.87     | 98.00     |
| <b>11</b>  | 65        | 1         | 2          | 97.58     | 67.82     | 70.77     | 65.11     | 68.34     |
| <b>12</b>  | 65        | 2         | 2          | 77.58     | 88.83     | 90.01     | 86.06     | 87.98     |
| <b>13</b>  | 65        | 1         | 1          | 95.62     | 95.66     | 96.38     | 96.48     | 95.88     |
| <b>14</b>  | 65        | 1         | 1          | 95.58     | 95.68     | 96.35     | 96.51     | 95.85     |
| <b>15</b>  | 65        | 1         | 1          | 95.61     | 95.71     | 96.40     | 96.47     | 95.90     |

**Table S3** Column regeneration

| Analytes | No. of cycles         |          |          |
|----------|-----------------------|----------|----------|
|          | 1                     | 22       | 45       |
| Co       | 99.2±0.6 <sup>a</sup> | 98.7±1.1 | 96.2±1.4 |
| Cr       | 97.9±1.3              | 97.6±1.3 | 97.1±1.1 |
| Mn       | 98.6±0.8              | 97.9±0.8 | 95.3±1.2 |
| Ni       | 100.3±0.2             | 99.4±1.0 | 97.1±0.5 |
| Ti       | 100.7±0.4             | 98.3±1.4 | 97.9±0.4 |

<sup>a</sup>Average ± standard deviation**Table S4** Effect of various interfering cations on the preconcentration and determination of Co, Cr, Mn, Ni and Ti using online  $\mu$ -SPE-ICP-MS method: Concentration of interfering ion = 200  $\mu\text{g L}^{-1}$ 

| Analyte | Recovery (%)          |           |          |          |          |          |
|---------|-----------------------|-----------|----------|----------|----------|----------|
|         | Ag(I)                 | Cd(II)    | Cu(II)   | Fe(II)   | Pb(II)   | Zn(II)   |
| Co      | 97.2±2.2 <sup>a</sup> | 96.8±2.4  | 97.2±2.2 | 97.3±1.3 | 97.8±2.4 | 98.0±0.9 |
| Cr      | 98.0±1.2              | 97.3±1.1  | 98.1±2.1 | 97.0±1.5 | 97.1±2.1 | 99.1±1.5 |
| Mn      | 98.9±1.4              | 99.1±0.87 | 98.3±1.2 | 97.8±3.3 | 98.3±1.2 | 95.4±1.2 |
| Ni      | 97.4±2.4              | 96.9±1.8  | 97.1±1.5 | 96.4±1.1 | 96.3±0.8 | 96.8±1.1 |
| Ti      | 98.2±2.1              | 98.1±2.4  | 96.9±2.4 | 97.2±2.1 | 98.9±1.2 | 95.9±3.0 |

<sup>a</sup>Average ± standard deviation

## SUPPLEMENTARY FIGURES

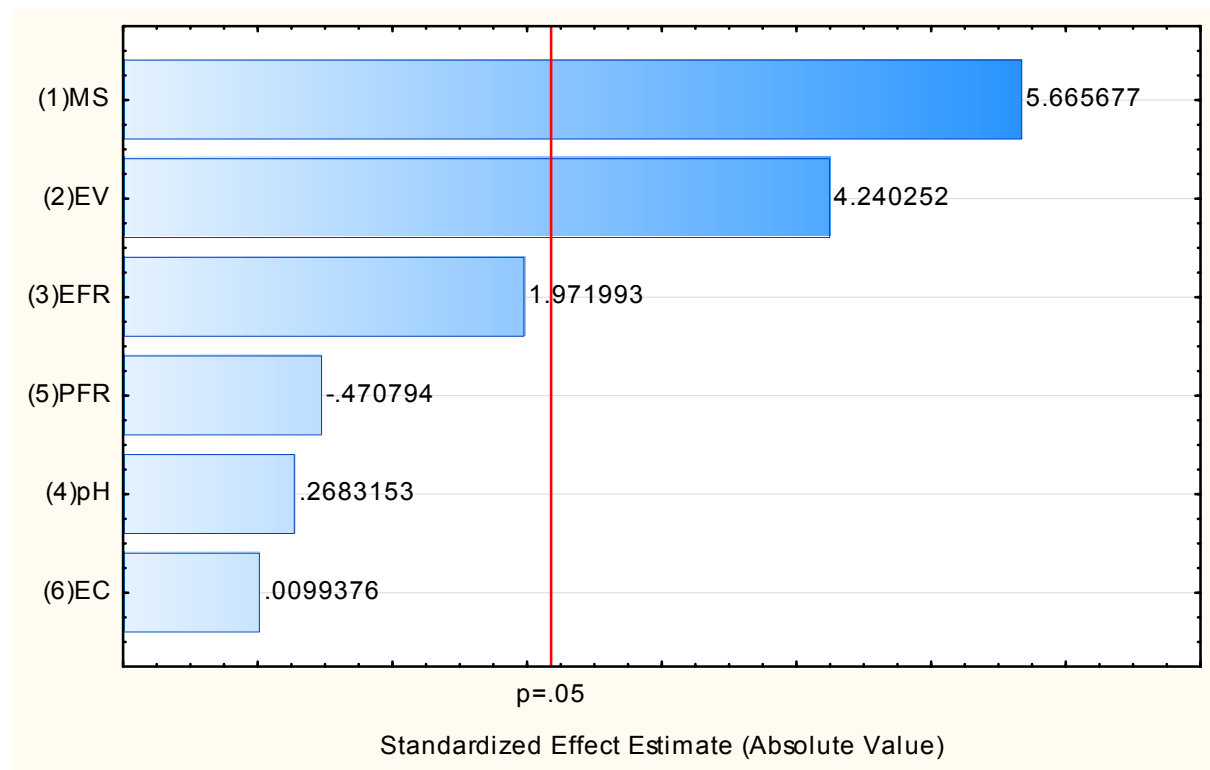

**Fig. S1** Pareto chart of standardized effects for variables in the separation and preconcentration of Co: EC= eluent concentration ( $\text{mol L}^{-1}$ ) and SFR=sample flow rate ( $\text{mL min}^{-1}$ )

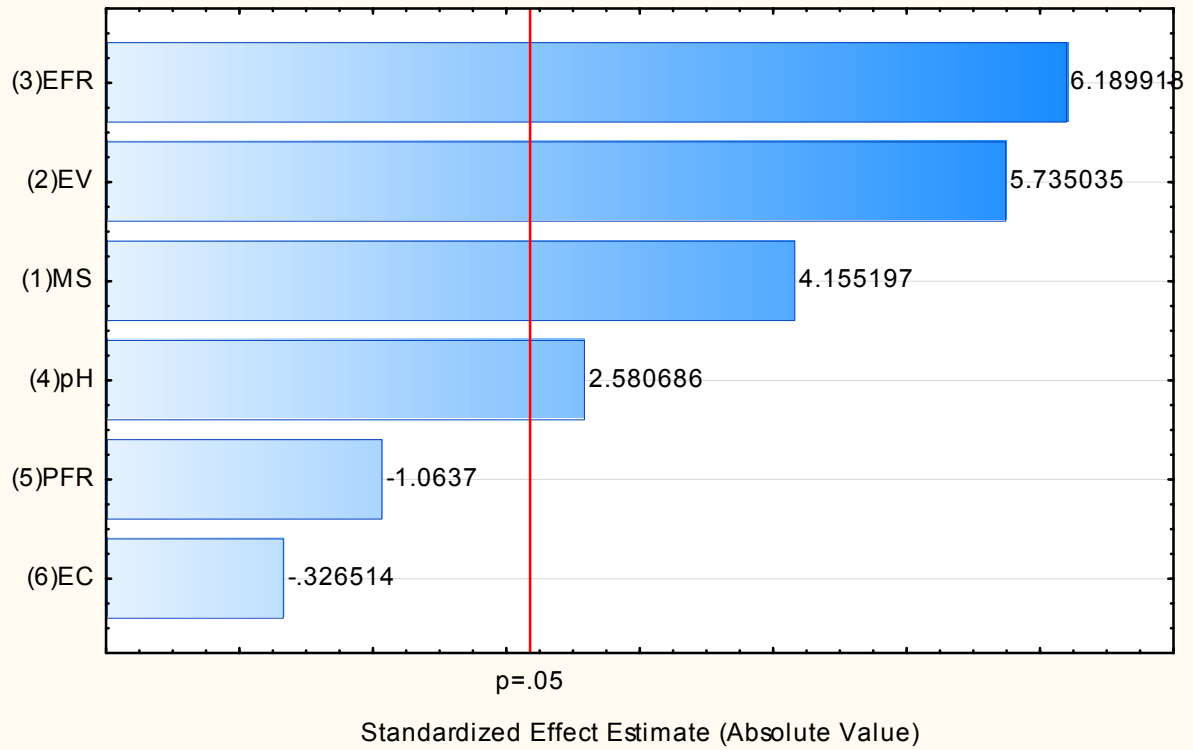

**Fig. S2** Pareto chart of standardized effects for variables in the separation and preconcentration of Cr: EC= eluent concentration ( $\text{mol L}^{-1}$ ) and SFR=sample flow rate ( $\text{mL min}^{-1}$ )

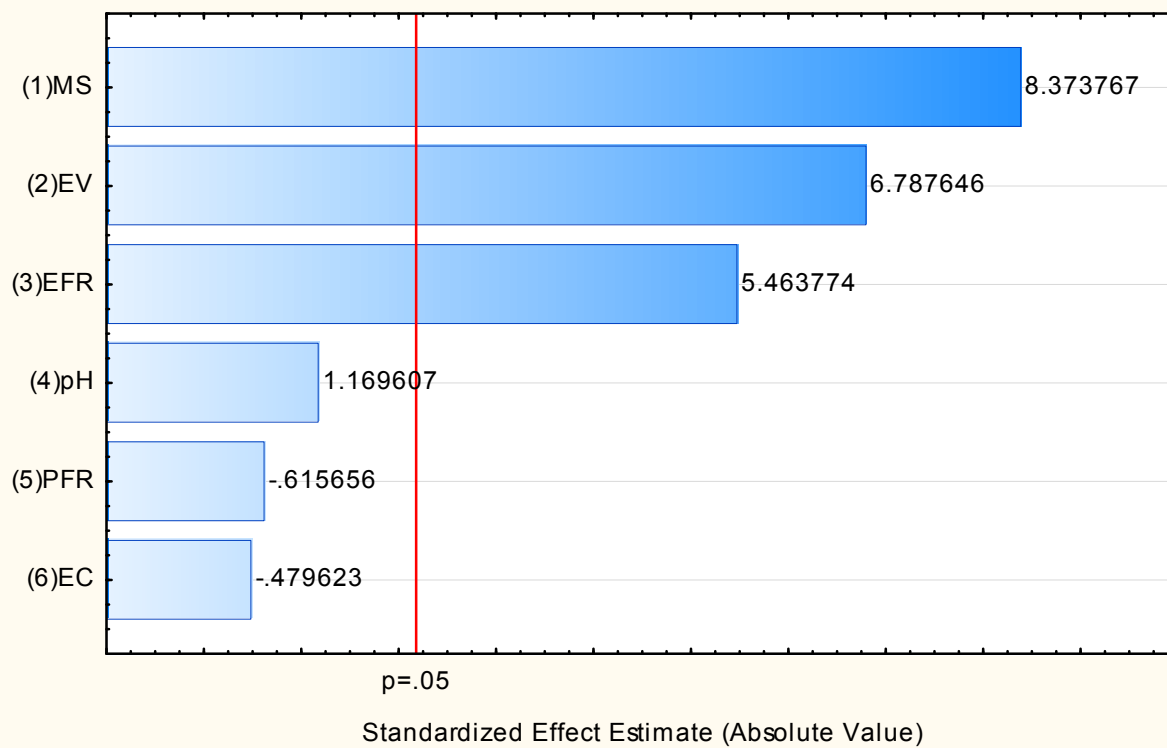

**Fig. S3** Pareto chart of standardized effects for variables in the separation and preconcentration of Mn: EC= eluent concentration ( $\text{mol L}^{-1}$ ) and SFR=sample flow rate ( $\text{mL min}^{-1}$ )

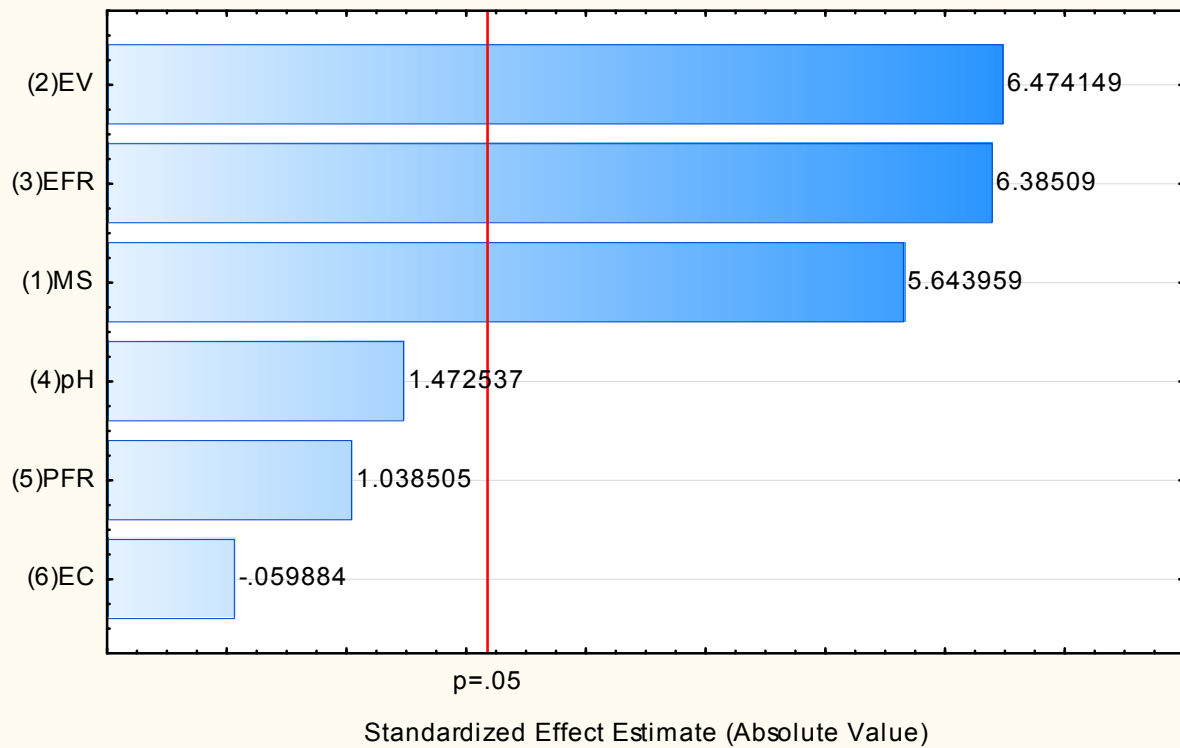

**Fig. S4** Pareto chart of standardized effects for variables in the separation and preconcentration of Ni: EC= eluent concentration ( $\text{mol L}^{-1}$ ) and SFR=sample flow rate ( $\text{mL min}^{-1}$ )

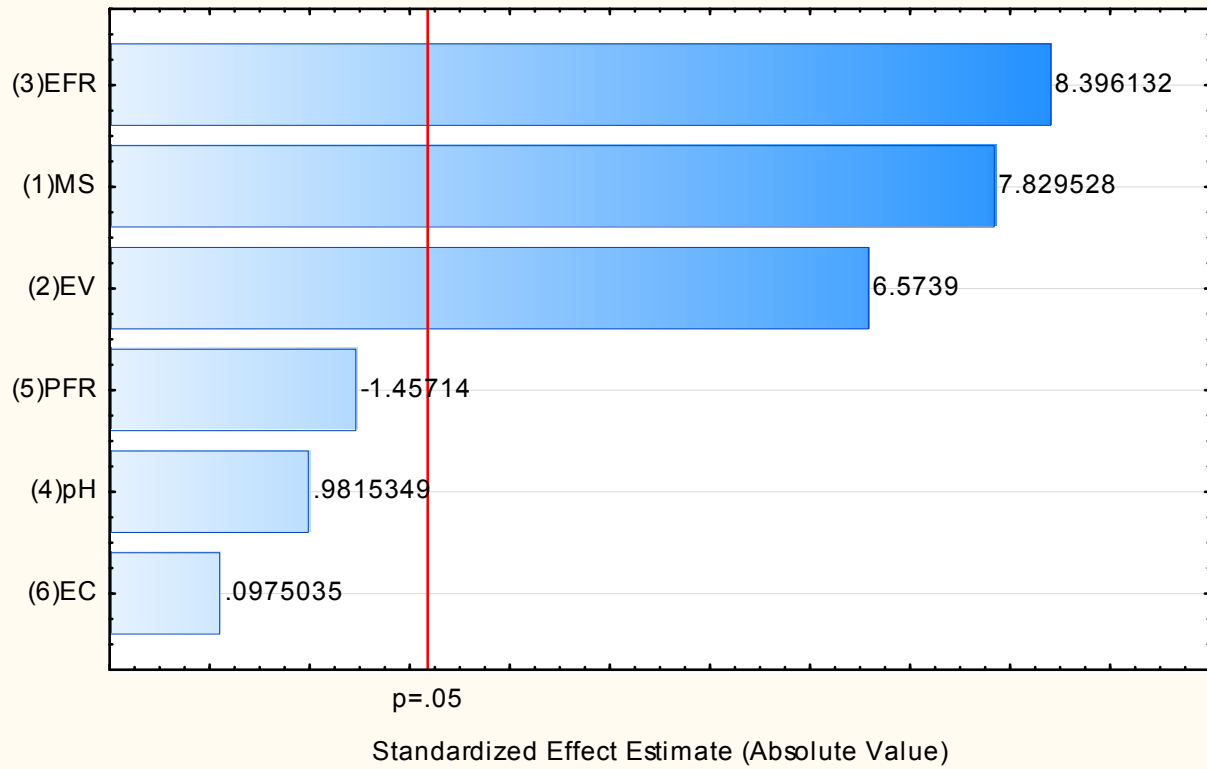

**Fig. S5** Pareto chart of standardized effects for variables in the separation and preconcentration of Ti: EC= eluent concentration ( $\text{mol L}^{-1}$ ) and SFR=sample flow rate ( $\text{mL min}^{-1}$ )



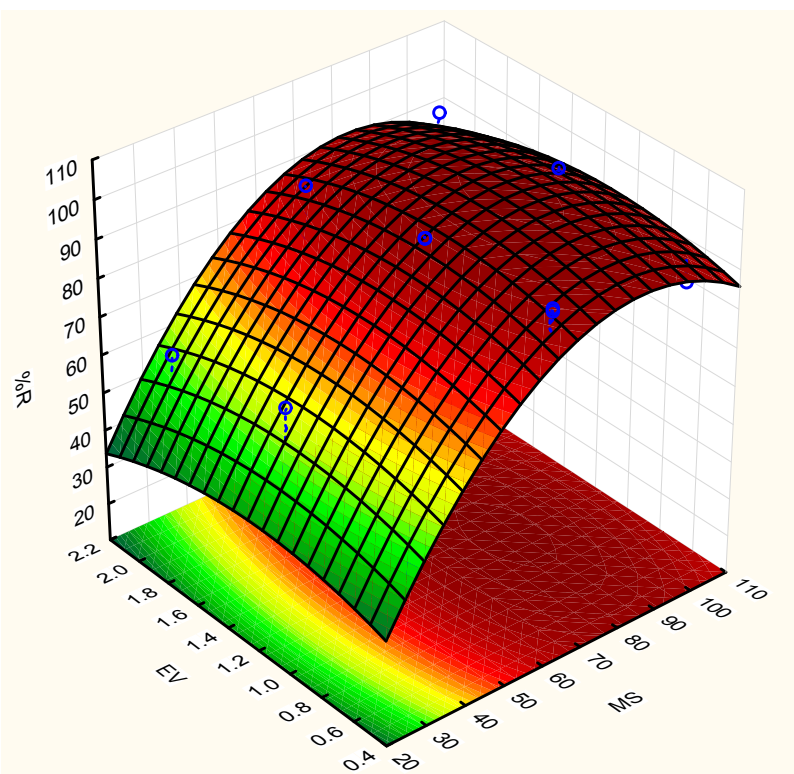

Fig. S6. Response surface for percentage recovery of cobalt, as function of mass of the sorbent (MS), mg and eluent volume (EV), mL at constant eluent flow rate (EFR) of  $1.0 \text{ mL min}^{-1}$

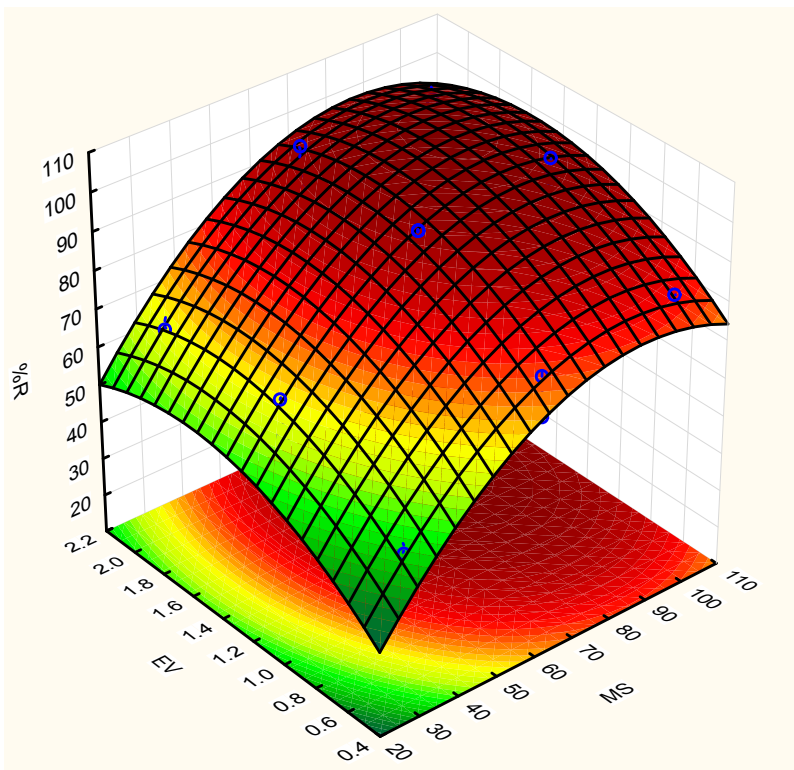

Fig. S7. Response surface for percentage recovery of chromium, as function of mass of the sorbent (MS), mg and eluent volume (EV), mL at constant eluent flow rate (EFR) of  $1.0 \text{ mL min}^{-1}$

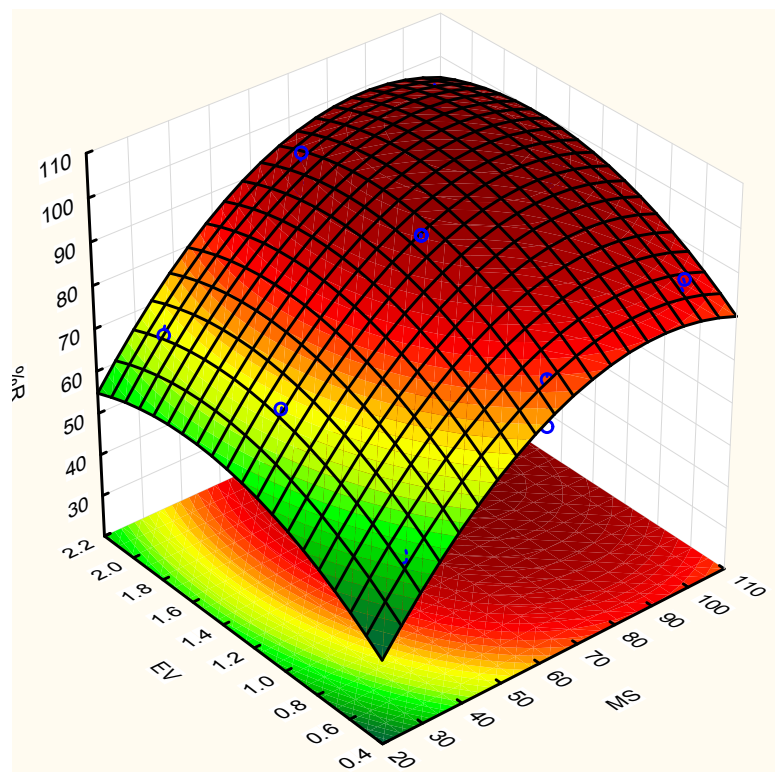

Fig. S8. Response surface for percentage recovery of manganese, as function of mass of the sorbent (MS), mg and eluent volume (EV), mL at constant eluent flow rate (EFR) of  $1.0 \text{ mL min}^{-1}$

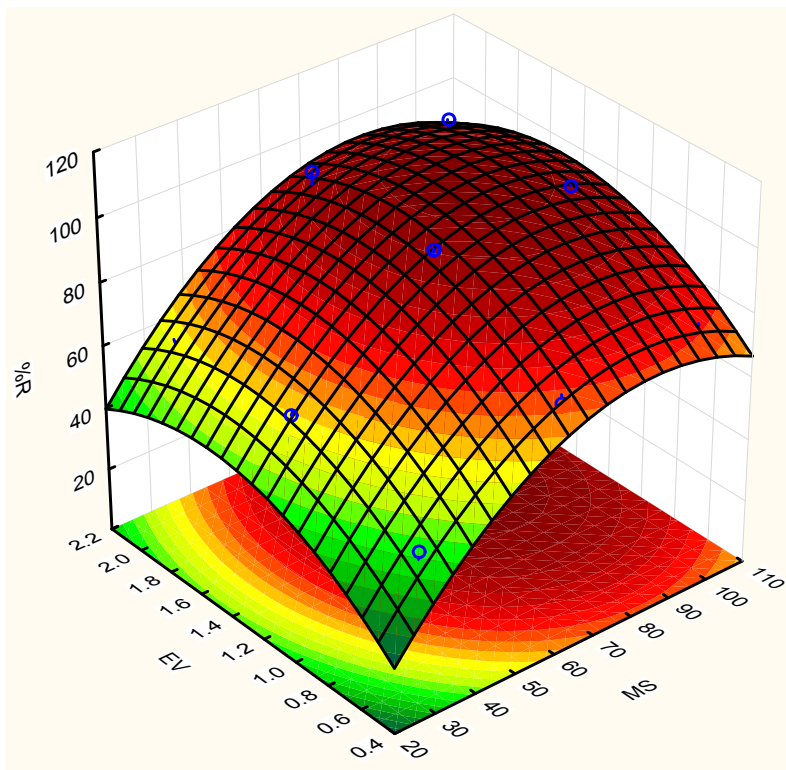

Fig. S9. Response surface for percentage recovery of nickel, as function of mass of the sorbent (MS), mg and eluent volume (EV), mL at constant eluent flow rate (EFR) of  $1.0 \text{ mL min}^{-1}$

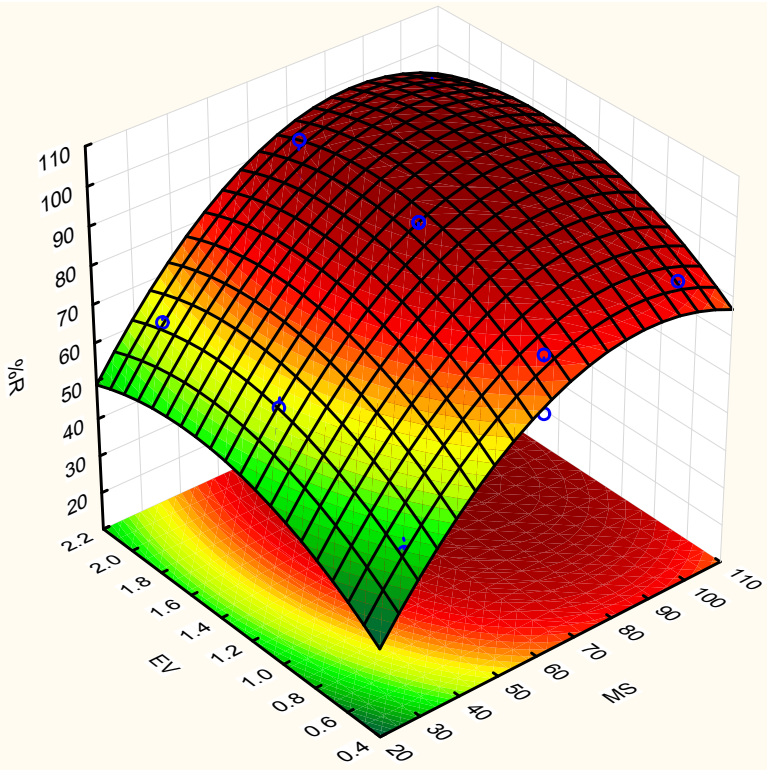

Fig. S10. Response surface for percentage recovery of titanium, as function of mass of the sorbent (MS), mg and eluent volume (EV), mL at constant eluent flow rate (EFR) of 1.0 mL min<sup>-1</sup>
